# Supplementary material for: Various Clinical Presentations of Uveitis Associated with Durvalumab Treatment
Source: PubMed Central journal article supplement — Radiol Oncol. 2022 Apr 12;56(2):129–37. doi: 10.2478/raon-2022-0007 (PMC9122297; doi:10.2478/raon-2022-0007), 2022-04-12
Supplement: raon-56-129_SM.pdf [file raon-56-129_SM.pdf]

# Various clinical presentations of uveitis associated with durvalumab treatment

Nika Vrabcic, Ana Fakin, Polona Jaki Mekjavic, Urska Janzic, Martina Vrankar, Natasa Vidovic Valentincic

doi: 10.2478/raon-2022-0007

**SUPPLEMENTARY TABLE 1.** Case I. Work up of patient data. Results were within normal limits

|                                                                            |
|----------------------------------------------------------------------------|
| Complete blood cell count                                                  |
| C-reactive protein                                                         |
| Erythrocyte sedimentation rate                                             |
| Serum angiotensin-converting enzyme                                        |
| Treponemal chemiluminescence immunoassay                                   |
| Interferon-gamma release assay                                             |
| Chemiluminescence immunoassay for detection of <i>Borrelia burgdorferi</i> |

**SUPPLEMENTARY TABLE 2.** Case II. Work up of patient data. All serology and PCR results were negative, except for positive *Toxoplasma gondii* IgG antibodies that indicated past infection

|                                                                                                            |
|------------------------------------------------------------------------------------------------------------|
| Complete blood cell count                                                                                  |
| C-reactive protein                                                                                         |
| Erythrocyte sedimentation rate                                                                             |
| Serum angiotensin-converting enzyme                                                                        |
| Treponemal chemiluminescence immunoassay                                                                   |
| Interferon-gamma release assay                                                                             |
| Chemiluminescence immunoassay for detection of <i>Borrelia burgdorferi</i>                                 |
| Toxoplasma, <i>Toxocara</i> and <i>Bartonella</i> serology testing                                         |
| SARS CoV-2 antigen testing                                                                                 |
| Rheumatological autoantibody testing (HEp-2, aCL, anti-beta2GPI, ANCA/MPO/PR3)                             |
| Aqueous humour PCR ( <i>Toxoplasma</i> , Varicella zoster virus, Herpes simplex 1, Herpes simplex virus 2) |

**OD(R) at presentation**

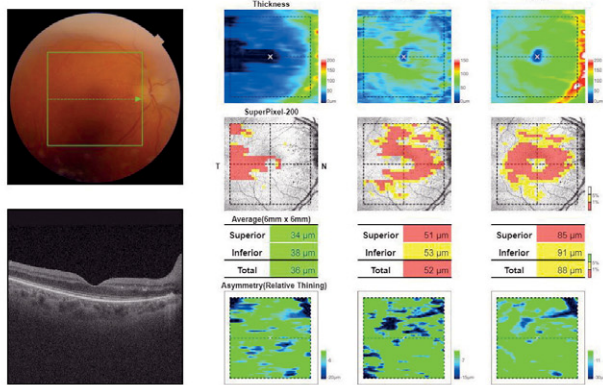

**OS(L) at presentation**

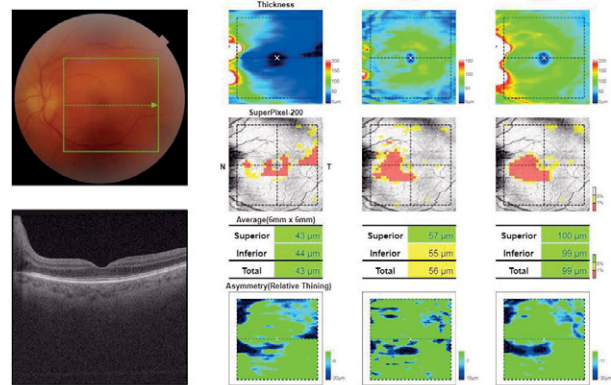

**OD(R) 5-week follow-up**

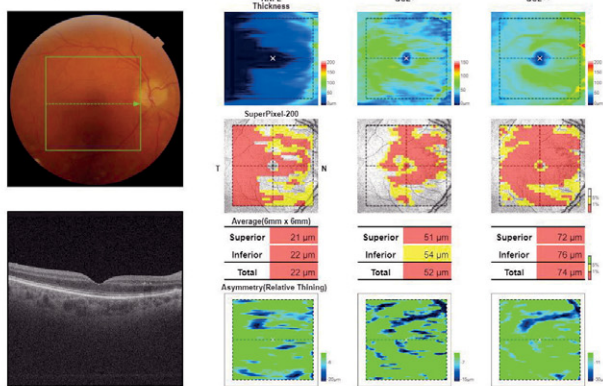

**OS(L) 5-week follow-up**

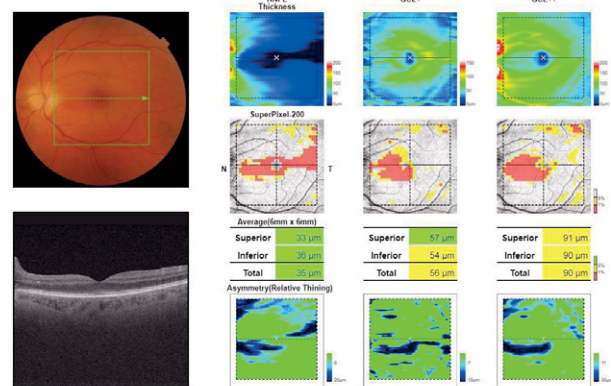

**SUPPLEMENTARY FIGURE 1.** Case I. Retinal nerve fibre and ganglion cell layer trend. Right and left eye at presentation and five weeks on methylprednisolone treatment.

OD(R) = oculus dexter (right); OS(L) = oculus sinister (left)
